# Supplementary material for: Liraglutide Treatment Ameliorates Neurotoxicity Induced by Stable Silencing of Pin1
Source: PubMed Central journal article supplement (PMC6829573; doi:10.3390/ijms20205064), 2019-10-12

**A**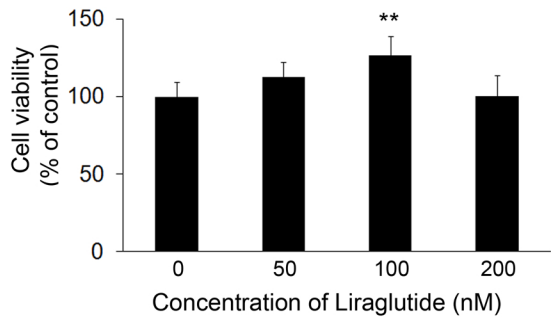**B**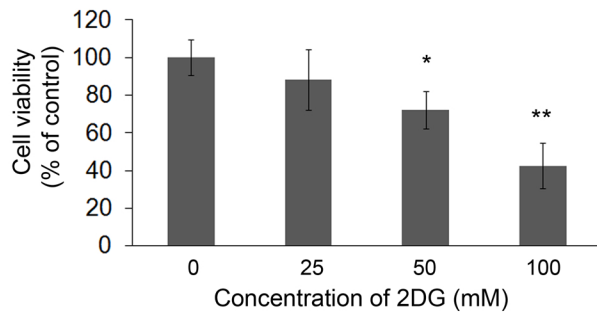**C**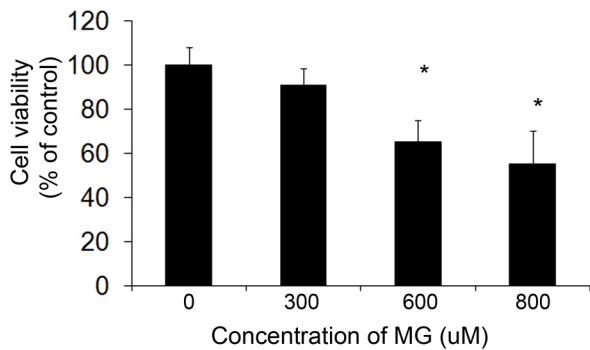

Supplement: ijms-20-05064-s001.pdf [file ijms-20-05064-s001.pdf]
